# Supplementary material for: Transcription Factor Homeobox D9 Drives the Malignant Phenotype of HPV18-Positive Cervical Cancer Cells via Binding to the Viral Early Promoter
Source: MDPI journal article supplement (doi:10.3390/cancers13184613), 2021-09-15
Supplement: s1 [file s1]

# Supplementary Materials: Transcription Factor Homeobox D9 Drives the Malignant Phenotype of HPV18-Positive Cervical Cancer Cells via Binding to the Viral Early Promoter

Shigenori Hayashi, Takashi Iwata, Ryotaro Imagawa, Masaki Sugawara, Guanliang Chen, Satoko Tanimoto, Yo Sugawara, Ikumo Tanaka, Tomoya Matsui, Hiroshi Nishio, Masaru Nakamura, Yuki Katoh, Seiichiro Mori, Iwao Kukimoto and Daisuke Aoki

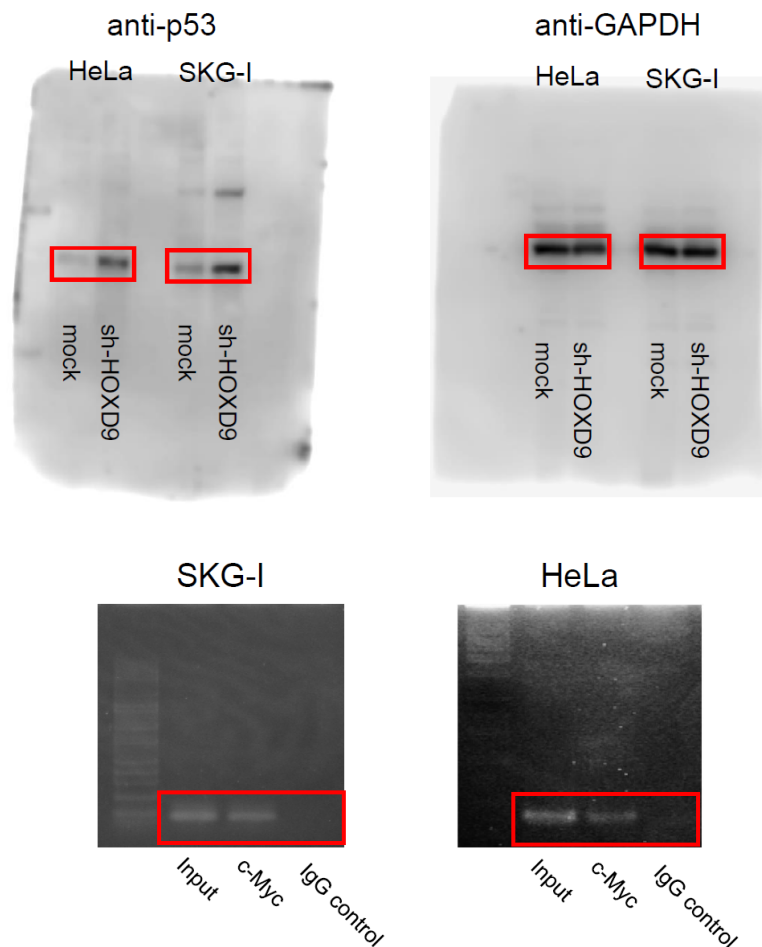

**Figure S1:** Original western blot figures for Figure 2D and 4B.

**Table S2.** The top 20 inhibited upstream regulators predicted by IPA.

| Upstream Regulator | Molecule Type           | Activation z-Score | p-Value of Overlap |
|--------------------|-------------------------|--------------------|--------------------|
| IFNA               | cytokine                | -5.742             | 0.0000302          |
| IRF7               | transcription regulator | -4.990             | 0.00142            |
| IFNL1              | cytokine                | -4.949             | 0.0000141          |
| IKBKG              | kinase                  | -4.176             | 0.0408             |
| poly rI:rC-RNA     | biologic drug           | -4.074             | 0.0000491          |
| Ifn                | group                   | -4.036             | 0.0233             |
| TBX2               | transcription regulator | -4.031             | 0.0000553          |
| DDX58              | enzyme                  | -3.926             | 0.000599           |
| RABL6              | other                   | -3.922             | 0.000169           |
| CHUK               | kinase                  | -3.766             | 0.000195           |
| TLR3               | transmembrane receptor  | -3.761             | 0.00341            |
| E2f                | group                   | -3.568             | 0.000703           |
| Ifnar              | group                   | -3.530             | 0.0638             |
| PDGF BB            | complex                 | -3.518             | 0.0000718          |
| IRF5               | transcription regulator | -3.475             | 0.0413             |
| IKBKB              | kinase                  | -3.414             | 0.0114             |
| CCND1              | transcription regulator | -3.270             | 0.000379           |
| TBK1               | kinase                  | -3.186             | 0.00818            |
| SREBF2             | transcription regulator | -3.000             | 0.0259             |
| stallimycin        | biologic drug           | -2.917             | 0.0022             |
